# Supplementary material for: Molecular Diversity of Midbrain Development in Mouse, Human, and Stem Cells
Source: PubMed Central journal article supplement (PMC5055122; doi:10.1016/j.cell.2016.09.027), 2016-10-06
Supplement: mmc1.pdf [file mmc1.pdf]

**Cell, Volume 167**

## **Supplemental Information**

### **Molecular Diversity of Midbrain Development in Mouse, Human, and Stem Cells**

**Gioele La Manno, Daniel Gyllborg, Simone Codeluppi, Kaneyasu Nishimura, Carmen Salto, Amit Zeisel, Lars E. Borm, Simon R.W. Stott, Enrique M. Toledo, J. Carlos Villaescusa, Peter Lönnerberg, Jesper Ryge, Roger A. Barker, Ernest Arenas, and Sten Linnarsson**

| <b>Table S1. Related to Figure 1. Tissue used per experiment</b> |                                                                                                                                 |     |    |    |     |               |
|------------------------------------------------------------------|---------------------------------------------------------------------------------------------------------------------------------|-----|----|----|-----|---------------|
| Mouse (embryonic) CD-1                                           |                                                                                                                                 |     |    |    |     |               |
| Embryonic Age (E)                                                | Embryos used per experiment (each cell is a separate day; number represents litter mates collected from one mother)             |     |    |    |     | Total (n=)    |
| 11.5                                                             | 12                                                                                                                              | 15  | 12 | 11 | 13  | 5             |
| 12.5                                                             | 11                                                                                                                              | 15  | 13 | 14 |     | 4             |
| 13.5                                                             | 15                                                                                                                              | 11  | 14 |    |     | 3             |
| 14.5                                                             | 7                                                                                                                               | 16  | 12 | 13 | 12  | 5             |
| 15.5                                                             | 15                                                                                                                              | 14  | 10 |    |     | 3             |
| 18.5                                                             | 6                                                                                                                               | 10  |    |    |     | 2             |
| Total embryos collected                                          |                                                                                                                                 |     |    |    | 271 |               |
| Total embryonic experiments                                      |                                                                                                                                 |     |    |    |     | n=22          |
| Mouse (postnatal) CD-1                                           |                                                                                                                                 |     |    |    |     |               |
| Age (days)                                                       | Brains used per experiment (each cell is a separate day)                                                                        |     |    |    |     | Total (n=)    |
| P19                                                              | 2                                                                                                                               |     |    |    |     | 1             |
| P20                                                              | 2                                                                                                                               | 3   |    |    |     | 2             |
| P21                                                              | 2                                                                                                                               | 3   | 3  |    |     | 3             |
| P23                                                              | 2                                                                                                                               | 3   |    |    |     | 2             |
| P24                                                              | 3                                                                                                                               | 3   | 3  |    |     | 3             |
| P25                                                              | 3                                                                                                                               |     |    |    |     | 1             |
| P26                                                              | 3                                                                                                                               | 3   |    |    |     | 2             |
| Mouse (postnatal) Dat1-Cre/tdTomato                              |                                                                                                                                 |     |    |    |     |               |
| Age (days)                                                       | Brains used per experiment (each cell is a separate day)                                                                        |     |    |    |     | Total (n=)    |
| P26                                                              | 1                                                                                                                               |     |    |    |     | 1             |
| P28                                                              | 1                                                                                                                               |     |    |    |     | 1             |
| P56                                                              | 1                                                                                                                               | 1   | 1  |    |     | 3             |
| Total postnatal experiments                                      |                                                                                                                                 |     |    |    |     | n=19          |
| Human (fetal)                                                    |                                                                                                                                 |     |    |    |     |               |
| Age (weeks)                                                      | Each cell is a separate day. 1+1 means that a second experiment is completed 24h after first with the other half of same tissue |     |    |    |     | Total fetuses |
| 6                                                                | 1                                                                                                                               |     |    |    |     | 1             |
| 7                                                                | 1                                                                                                                               | 1   |    |    |     | 2             |
| 7.5                                                              | 1                                                                                                                               |     |    |    |     | 1             |
| 8                                                                | 1+1                                                                                                                             |     |    |    |     | 1             |
| 9                                                                | 1+1                                                                                                                             | 1+1 |    |    |     | 2             |
| 10                                                               | 1                                                                                                                               | 1+1 |    |    |     | 2             |
| 11                                                               | 1+1                                                                                                                             |     |    |    |     | 1             |
| Total                                                            |                                                                                                                                 |     |    |    |     | n=10          |

|                         |                                                                                                                                                  |   |  |  |  |  |
|-------------------------|--------------------------------------------------------------------------------------------------------------------------------------------------|---|--|--|--|--|
| hPSC cultures           |                                                                                                                                                  |   |  |  |  |  |
|                         | Each cell is a separate day. Number indicates number of separate biological replicates (different cultures) run on that day. samples not pooled. |   |  |  |  |  |
| H9                      |                                                                                                                                                  |   |  |  |  |  |
| Day 0                   | 2                                                                                                                                                |   |  |  |  |  |
| Day 12                  | 4                                                                                                                                                |   |  |  |  |  |
| Day 18                  | 2                                                                                                                                                |   |  |  |  |  |
| Day 35                  | 4                                                                                                                                                |   |  |  |  |  |
| HS401                   |                                                                                                                                                  |   |  |  |  |  |
| Day 0                   | 2                                                                                                                                                |   |  |  |  |  |
| Day 12                  | 4                                                                                                                                                |   |  |  |  |  |
| Day 17                  | 2                                                                                                                                                |   |  |  |  |  |
| Day 35                  | 4                                                                                                                                                |   |  |  |  |  |
| iPS (iCell DopaNeurons) |                                                                                                                                                  |   |  |  |  |  |
| Day 5 (47)              | 4                                                                                                                                                |   |  |  |  |  |
| Day 21 (63)             | 4                                                                                                                                                | 4 |  |  |  |  |

**Table S3. Related to Figure 3. Probe sequences (5' -> 3') for single molecule RNA FISH**

| Probe | Ednrb                 | Cd36                  | Foxj1                 |
|-------|-----------------------|-----------------------|-----------------------|
| 1     | agtaagttaagttgcgcg    | actctgaaaggatcagcact  | ccagaggaaggttctggaag  |
| 2     | tcgaaaaacacactagccc   | acagcaatgatgagctgtt   | ctccgaacacgaatgtgagg  |
| 3     | acaggacacttaagtcagct  | ccggttctactaattcatgc  | gaacactcactccattctg   |
| 4     | tttcagctcgagaccaac    | ccaggtaaatcacagtgtt   | cagactccagttacacagtc  |
| 5     | cgattgcatgttacagcttg  | gcagaatcaagggagagcac  | gtcaacatccacaggctgag  |
| 6     | ttagtcccgagaagtgcacag | taacagctccagcaatgagc  | cttggcgttgagaatggaga  |
| 7     | aggaacgcatcagactggag  | tcicaataagcatgtctccg  | gagatgtgcacgacgatgtg  |
| 8     | caataattcgttggcacgga  | acaacttccctttgattgt   | ataggagtgggtggcttca   |
| 9     | acacagggcacgcacaatc   | ttgaaagcagtggttcctt   | catggccatgcagatgagag  |
| 10    | agatgatcttagcagcgtg   | aactgtctgtacacagtgtt  | cgacagagtgtatcttgggg  |
| 11    | gcgatcaagatattgggacc  | atctgggtttgcacatcaa   | ccgtgatccactttagatg   |
| 12    | tgatgatgtgcagtaggtct  | gattttgctgctgttctttg  | catggcgggaagtagcagaag |
| 13    | cgagcaactgtagggttta   | atgtgtaaggacctctttgt  | aggcactttgatgaagcact  |
| 14    | gagcacaagactcagcact   | gagttatatttcttggct    | aaaggcaggggtgatgtgga  |
| 15    | ccaagaagcaacagctcgat  | aaagacacagtggttcctc   | tcaaactctgaagcagctg   |
| 16    | gaacccaattccttaaft    | gtgaaggctcaaagatggct  | cagcagtaaggtgctgggag  |
| 17    | aatttctactgctgcatt    | cacaccaactgtgtactta   | ttacctttgagtggtccag   |
| 18    | cacagagaccacccaaatta  | ccatctacagtgctattgta  | aaagatggcctcccagtcaa  |
| 19    | ctttgtagtccgacgtaac   | cttatgtatcctttccatt   | ggactgtaagatccacatct  |
| 20    | aggctgttttctgaaagggga | tgccattaatcatgtcgcaa  | gtagcagggcagttgatgtg  |
| 21    | ggctgtcttctgaaactgca  | ccgaacacagcgtatagata  | atcaaagtccaggctgtcag  |
| 22    | aagactgcagtgatggctag  | ggattccttaaggtcgatt   | gaaggatgtggccaagaagg  |
| 23    | caaagcaatctgcataccgc  | ggcattggctggaagaacaa  | ttcaaagatgggttctgggg  |
| 24    | tcgtctctgcttaagtgat   | aatggtgtctggattctgg   | ttttacaagaaggcaccac   |
| 25    | aaagctcagaagctcacacc  | tctggactgcatgtaggaa   | ttgagcactgtccggagatg  |
| 26    | gttgataccaatgtagtcca  | gtaagccttcaataggttct  | ggcttgatagaggacatc    |
| 27    | tgacaggagtcaagaagcc   | cctatgctcatcttcattg   | aaacactgtgtgatggggg   |
| 28    | tgctcaccaaatacagagcg  | gttatgggtccacatctaa   | tgaggcgaagcttgggtgag  |
| 29    | accagcagcacaacatgac   | accaatatgtgacctgcag   | ccagagaagcagcagaagtg  |
| 30    | aggactgcttttctcaaac   | cttctattttctagctggc   | ggaactttctctgggtagag  |
| 31    | tggaaccggaagttgtcatat | catttagccacagtataggt  | taatgagcgtttgtgtacc   |
| 32    | ccttcaagacgagctgtatt  | atgccaaggagcttgatttt  | cctcctgggaattaattgt   |
| 33    | agaatgggaatatttcccca  | caacaaacatcaccactcca  | cgggcttagagaccatttcg  |
| 34    | atgacgtggcagtgacgaac  | ttctggatttgcaagcaca   | aggtgatggaccagggaaag  |
| 35    | acaaggttaagctctcggg   | gctcatccactactatttt   | aagtcaggctggaaggttg   |
| 36    | cattttcaacatgtggcctg  | gatgtagccagtgatatgt   | catcttctgatgctcttag   |
| 37    | ccggttgggtttattgtatt  | ttttgtagatcggtttacc   | cccagttaagcttagctat   |
| 38    | tggtctggtttttacctc    | agtccactcagttgcaaatg  | tagtatagacagggcctag   |
| 39    | catgtgtcacgtggattcag  | cctccagtgagggaaaacaa  | aggggtcaaggtggagcaag  |
| 40    | actgtgggtgactcctaag   | agttgcaagccaaattgtct  | cacgtggaggttagattcag  |
| 41    | aattgaagatctggggcgtc  | gttatacttatgccatgtgc  |                       |
| 42    | actactggggagccaataac  | cagtggtcacatgtgaatt   |                       |
| 43    | attattgccatgaagaggg   | cttctgttagccaagaactc  |                       |
| 44    | tgccatttcataatttgca   | tgacagcatggaacatgacga |                       |
| 45    | gaccttaacatccttgta    | ttgctttgtaggattccat   |                       |
| 46    | ttggctgttgacattatc    | aaaccagtcctttttggg    |                       |
| 47    | atgttaggtacaacacacc   | acaacctatcactgtgtctt  |                       |
| 48    | itagcaacgacacaagctgc  | taatgacatcgtttcccaca  |                       |

| Probe | Msx2                  | Rfx4                   | Slc6a11               |
|-------|-----------------------|------------------------|-----------------------|
| 1     | ctcaagcgaagactccaact  | agtaatccagtcgggcaag    | cagctacgctcaacacgaac  |
| 2     | ggagaagccatgactttctg  | gagacatcttcaatccagc    | ttttagcacaggtagggaa   |
| 3     | gaaacaagtaccgccttt    | ccagagatgtgtgactggaa   | caccacgtaaggaatcagga  |
| 4     | cttctgtcggacatgagcg   | gcaatctcatagtttctc     | cgttccaggaagaagacgg   |
| 5     | ctcgaagggctgacgagag   | cttctcacagaaatccaggt   | gccaggatgatgatgtagta  |
| 6     | tcttcggaatttccgactt   | aaagctggcagcattgacag   | ggggaagcaattgcttaggt  |
| 7     | ttggtctgtgttctctcag   | aaactgtcccttatgatct    | tggaactccacacatttctc  |
| 8     | gggatgtggtgaaggggtg   | aatgtactttgactgtcct    | tgtagttgctgaagttcagc  |
| 9     | ttgcgctccaaggctagaag  | ctggcagatttaggtctttg   | tcaatgccatcgatatagc   |
| 10    | atggacaggctactgtttctg | tctgacagtggttctgtac    | caggagacataatgccagtt  |
| 11    | tctggaaccagatttgacc   | gaacctcatcaaagttggct   | tgcagaagtagcagatggtc  |
| 12    | ttgcagcttttcgcttag    | ccttgccaaaagtcgagaag   | ctttccagtcgacttagtac  |
| 13    | attttcagctttccagttc   | gtagaggatggagtcacaca   | aggttcagtgacatacacg   |
| 14    | aagggcagactgaagcctga  | tccatggtatacagagtctg   | gaggtcaggttacagataga  |
| 15    | ttgcaggggtgagttgatag  | aactctggtacaactggat    | ctgtttagacagcagagcat  |
| 16    | taggatgcgccgtatatgga  | atccagccattctatgtaag   | ctgagaagatggcaaaccca  |
| 17    | gagcacaggtctatggaagg  | ctttacaacgcacatcggtcta | cttgggtaggcgatgaaag   |
| 18    | cgtggcatagagccaacag   | aagcaagaccacatcagcag   | acacaaactgactgtccagg  |
| 19    | tggtacatgccatatccaac  | aggtgaaaagaccggaagct   | ggaagaccttagggtagatg  |
| 20    | atctggtcttcttaggata   | ttctagaacagtagagcacgt  | tggcggcgtatgagtcacaaa |
| 21    | cgattcaggagcagagttg   | gcctctgtcaagataatctc   | acaaagagcaagcacatgcc  |
| 22    | tgtcgttagggtgacaatg   | cacagatgtggcagactttg   | ccgatgcagacacactcaaa  |
| 23    | gtgcctctcacctaaataac  | tagcgaccacgtatagact    | attgtcatagaaccgggtgc  |
| 24    | tgagaggaagggggcattt   | tagttgtgggagttctcag    | cggtaaccaatcatatcctc  |
| 25    | gaagtgacatcctgatgga   | tcctgtggaagggggaatag   | ccacttgatgagtgacagtg  |
| 26    | ccttcaactgcaagaatctg  | tggggctattgaaagggtag   | tgtacttgagcgggtttgac  |
| 27    | attctcatctcttttcatc   | tcaacaaggttccatcctg    | ccaagcaggatagtgtgaca  |
| 28    | ttaccctgagtaactctcag  | gggtgacatgtcactagagt   | ttctgtaatttctcggggag  |
| 29    | ctgacatggagtttctatt   | ctcatactcagaattcctgc   | ctcacagtcattaacggta   |
| 30    | aatatttcaccttcaaccc   | aagccaggaaagtgttgcac   | tctctgtgatggcagagatg  |
| 31    | ggactgatgtagatagcatt  | taaagtcttctggaggggtg   | gtacgaggttcaggattcat  |
| 32    | caatcacctctgtaccgtgt  | cccgaagttatgatgtatt    | atctgctagtcaactgtacag |
| 33    | gaagagatttaccatgtcct  | acatctctgttctcattagg   | gactctagaaaacaccggct  |
| 34    | ggccacagttataagacact  | tttagtgactcctgtttct    | gaacatcagaggcagatggg  |
| 35    | cctcattctatggactgttg  | cttggctacagaacccaat    | ttactcaggagtcttaacga  |
| 36    | ttccctaagaagtttagcac  | ccaagatagtgctctatag    | tgaaggacagtcagcaact   |
| 37    | gccaacacgtagagtata    | aaggtcatggaacagagggg   | tgaaggaagactccactca   |
| 38    | caactcaagcacatggcttc  | tcttggtaaattatgtgcc    | tacaagtctctgcaggtcaa  |
| 39    | ctgactgacaacgcatctc   | agtccggatgtgattacat    | gttaagggatcagggtagg   |
| 40    | cccattcaacgggataaaaa  | ggactccaggaagttagaat   | tggaatggctccagagtaag  |
| 41    |                       | ggcaggtacgaatggaactt   | agtggagtgaaaggcttctc  |
| 42    |                       | tccaggacaatgcaggtaat   | cttctgttccaaggaaga    |
| 43    |                       | tacagagaagaactgtgcc    | gcgtgaagacatctcacttt  |
| 44    |                       | agccattgtgcaaacctagg   | gtctctgacagaacactgga  |
| 45    |                       | agtggaggacagtgttagt    | agcattgggcaaatagagca  |
| 46    |                       | catccagcttcgcaagtaa    | ctgggcagaaacagtaagag  |
| 47    |                       | cttggctctgtcaagttaa    | gagtgcaagtgttaagggc   |
| 48    |                       | gaaacctccatattcttga    | aaaacagcccaacccttaa   |

| Probe | Sox10                 | Pdgfra                |
|-------|-----------------------|-----------------------|
| 1     | tgaatcctcaccaccaaca   | taagagctggcaggagatga  |
| 2     | gggagtgacgctgatggact  | tctcgttgggagatagag    |
| 3     | tcgtcctgaggaaagtggaaa | gagtggtgttagtagcaa    |
| 4     | acctctgataggtcttgttc  | gactaaggaatcggtcatcc  |
| 5     | cacacggggaacttgtcatc  | agattcagttctgacgttc   |
| 6     | acacatgaaggcgttcacg   | agtgacaccagttgatgg    |
| 7     | ttgtggaggtgagggactg   | ctgactctgcaagttgac    |
| 8     | tagtgtcttgctgagctcag  | tctcggtgagattctctatc  |
| 9     | ttgtcacttctgttcagcaa  | atttgcctctgatacctgtt  |
| 10    | tctcagcctcctcaatgaag  | atgggtgtcatctacgagat  |
| 11    | ttttgtgctgcatccggag   | cagatcatccagtcgatttc  |
| 12    | cgaggttggtactttagtc   | agacattgctggccaaaact  |
| 13    | ttgtagtgagcctgaatagc  | aacgctgaggtgttctttg   |
| 14    | tgctcttgggggtgttgag   | tgagttcagatcgagagtg   |
| 15    | acgttgccgaagtcgatgtg  | caatcaccaacagcaccaac  |
| 16    | atgttgacattacctctgtg  | caaatgaccaccaggagat   |
| 17    | agctcagtcacatcaaaggt  | aaatgcaccggatcccaaaa  |
| 18    | atctgggaagtggacggctg  | aaatgggacctgacttgggtg |
| 19    | gcagactgagggaaagtgtag | cccatagaagcagattctg   |
| 20    | aaactggggctgtagatgg   | tggtggctcatgaagctatc  |
| 21    | agggctgatggtcagaatag  | caatccaaagatgtccaggt  |
| 22    | tgcatggccataatagggtc  | acatactgtgtggtatcagc  |
| 23    | cagagatggcaggttagagg  | aaacctcttcccttcaagc   |
| 24    | tggtgggactgtggattg    | cgccgaaaggagggttttg   |
| 25    | ctaaggtcgggatagatcg   | cgtagttggaatcgtgcatg  |
| 26    | fgggagagccaccaaacttc  | acaccgatgtacgcattatc  |
| 27    | tcatttctggggaagggtgg  | caagtcctcttcaacttt    |
| 28    | tctcaggtcctgggatagag  | ccggagaggagagttaacac  |
| 29    | cttgctccaaggagataa    | tactcacggtggtagttt    |
| 30    | aggcaatgacacagtagcac  | tacttacctctgctctcta   |
| 31    | gttcaaagctgtcctcagtg  | cttattcaacagcaccatt   |
| 32    | ccacctgtctttacaaag    | caaatctctggggcaaaggt  |
| 33    | ggcggagaaggatcagagt   | gactattcaagagcaccagg  |
| 34    | tcccacattcaggtgaagag  | aaattcaaagttgccctcc   |
| 35    | tgacacggaactggatctgg  | tcaaggttaggaatagctgc  |
| 36    | tcagttaggcaaggatgag   | ggaagatgttccaagtcaa   |
| 37    | gagaagaaggctaggtggat  | atggagctggtgcacaaaag  |
| 38    | gggcttgaggctgacagaag  | cccatgttcattcatacag   |
| 39    | cggtccatgctaactctgag  | agattatgccagtaggtagt  |
| 40    | acatggcaggggttagtgt   | aagggaaagttggggtttgc  |
| 41    | gtgcaaggcaaaggtagact  | tcagtcttcacctactgt    |
| 42    | taaggtatcgctggagcaaa  | gccacgagtctagaagacg   |
| 43    | gagacagagctacgtacttt  | gtatcatccaacttcaggt   |
| 44    | fgggctgcagacaggagatg  | attgaatctcagagggtgggt |
| 45    | cagcgtatgtttacatgtgg  | cattttgtacaggtggcag   |
| 46    | acatggcgactatggagata  | tacgtccctctcacaata    |
| 47    | ctggagtagctagaggata   | gtcatacacattttggcagt  |
| 48    | aggcaaccagaagcattgat  | catctgtattggaagacc    |

| <b>Table S4. Related to Figure 7. qPCR primer sequences (5' -&gt; 3')</b> |               |                        |                         |             |
|---------------------------------------------------------------------------|---------------|------------------------|-------------------------|-------------|
| Gene                                                                      | Accession No. | Sense                  | Antisense               | Length (bp) |
| ALDH1A1                                                                   | NM_000689     | TGTTAGCTGATGCCGACTTG   | CTGGCCCTGGTGGTAGAATA    | 71          |
| CORIN                                                                     | NM_006587     | CATATCTCCATCGCCTCAGTTG | GGCAGGAGTCCATGACTGT     | 106         |
| EN1                                                                       | NM_001426     | CGTGGCTTACTCCCCATTTA   | TCTCGCTGTCTCTCCCTCTC    | 117         |
| FOXA2                                                                     | NM_021784     | TTCAGGCCCGGCTAACTCT    | AGTCTCGACCCCCACTTGCT    | 67          |
| GAPDH                                                                     | NM_002046     | GAAGGTGAAGGTCGGAGTCA   | TTGAGGTCAATGAAGGGGTC    | 117         |
| LMX1A                                                                     | NM_177398     | GATCCCTCCGACAGGGTCTC   | GGTTTCCCACTCTGGACTGC    | 175         |
| NANOG                                                                     | NM_024865     | ACAAGTGGCCGAAGAATAGCA  | GGTCCCAGTCGGGTTC        | 111         |
| NR4A2                                                                     | NM_006186     | CAGCTCCGATTCTTAACTCCAG | GGTGAGGTCCATGCTAACTTGA  | 52          |
| POU5F                                                                     | NM_002701     | AGGGCCCCATTTTGGTACC    | TCAGTTTGAATGCATGGGAGAGC | 136         |
| SOX1                                                                      | NM_005986     | GCGGAGCTCGTCGCATT      | GCGGTAACAACACAAAAAATTG  | 76          |
| TH                                                                        | NM_199292     | ACTGGTTCACGGTGGAGTTC   | TCTCAGGCTCCTCAGACAGG    | 117         |
